# Supplementary material
Source: publisher figshare collection journal article supplement (https://frontiersin.figshare.com/ndownloader/files/13000424)
Supplement: Supplementary file [file 13000424]

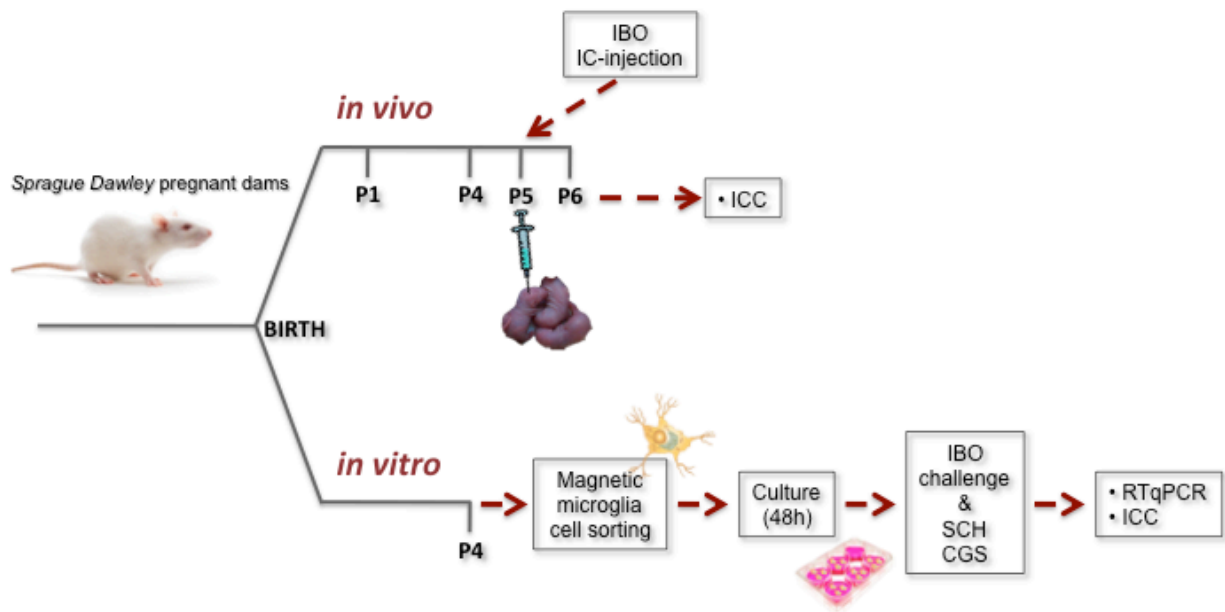

**Supplemental Figure S2:** Schematic overview of the experimental research plan using Ibotenate model.
